# Supplementary material for: Facile fabrication of a homogeneous cellulose/polylactic acid composite film with improved biocompatibility, biodegradability and mechanical properties
Source: Royal Society of Chemistry journal article supplement (doi:10.1039/c9gc01918a), 2019-01-01
Supplement: c9gc01918a1.pdf [file c9gc01918a1.pdf]

## Supplementary Information

### **Facile fabrication of homogeneous cellulose/polylactic acid composite film with improved biocompatible, biodegradable and mechanical properties**

Airong Xu,<sup>\*,†</sup> Yongxin Wang,<sup>†</sup> Jiayu Gao,<sup>†</sup> and Jianji Wang<sup>\*,‡</sup>

<sup>†</sup>School of Chemical Engineering and Pharmaceutics, Henan University of Science and Technology, Luoyang, Henan 471003, P. R. China

<sup>‡</sup>School of Chemistry and Chemical Engineering, Key Laboratory of Green Chemical Media and Reactions, Ministry of Education, Henan Normal University, Xinxiang, Henan 453007, P. R. China

#### **Table of Contents**

1. TGA curves of the cellulose, PLA and C/PLA films (Figure S1)
2. DSC curves of the cellulose, PLA and C/PLA(1:1) films (Figure S2)
3. DSC thermograms of the C/PLA(1:1) film (Figure S3)
4. SEM images of the pure cellulose film embedded in soil for different days (Figure S4)
5. SEM images of the C/PLA (1:1) film embedded in soil for different days (Figure S5)
6. SEM images of the pure PLA film embedded in soil for different days (Figure S6)
7. Breaking elongation of the cellulose and C/PLA films (Figure S7)
8. The cell viability data at different incubation times (Table S1)

## 1. TGA curves of the cellulose, PLA and C/PLA films

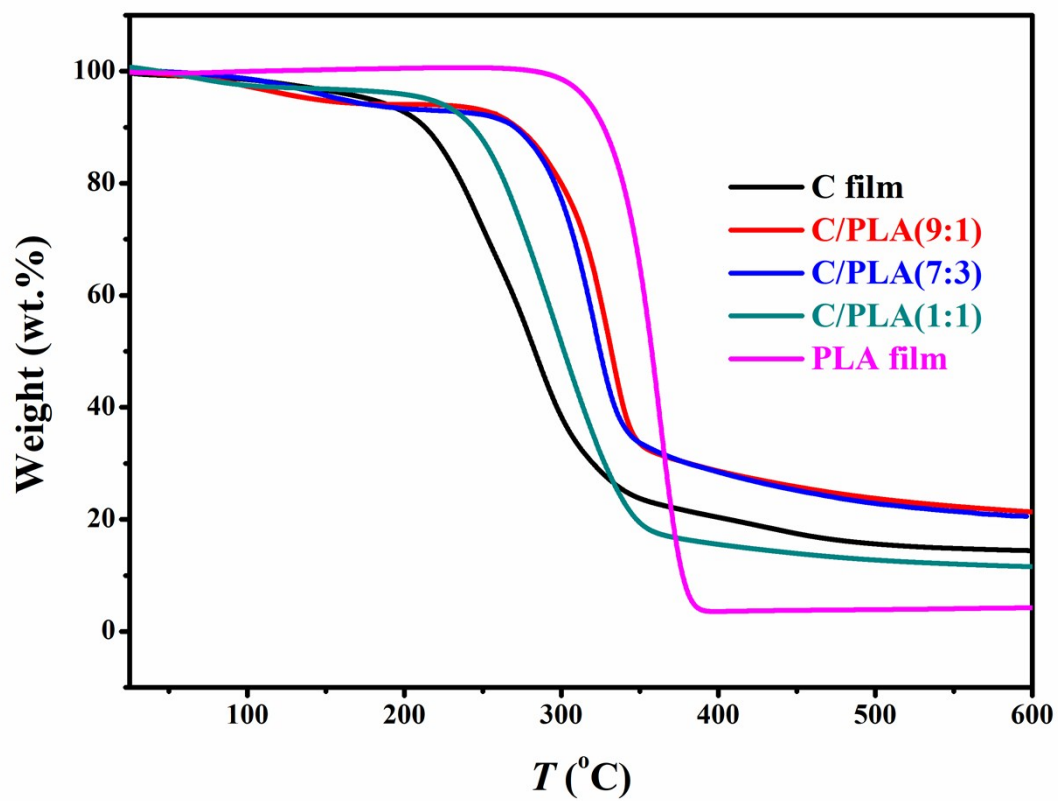

**Figure S1.** TGA curves of the cellulose, PLA and C/PLA films.

## 2. DSC curves for the cellulose, PLA and C/PLA(1:1) films

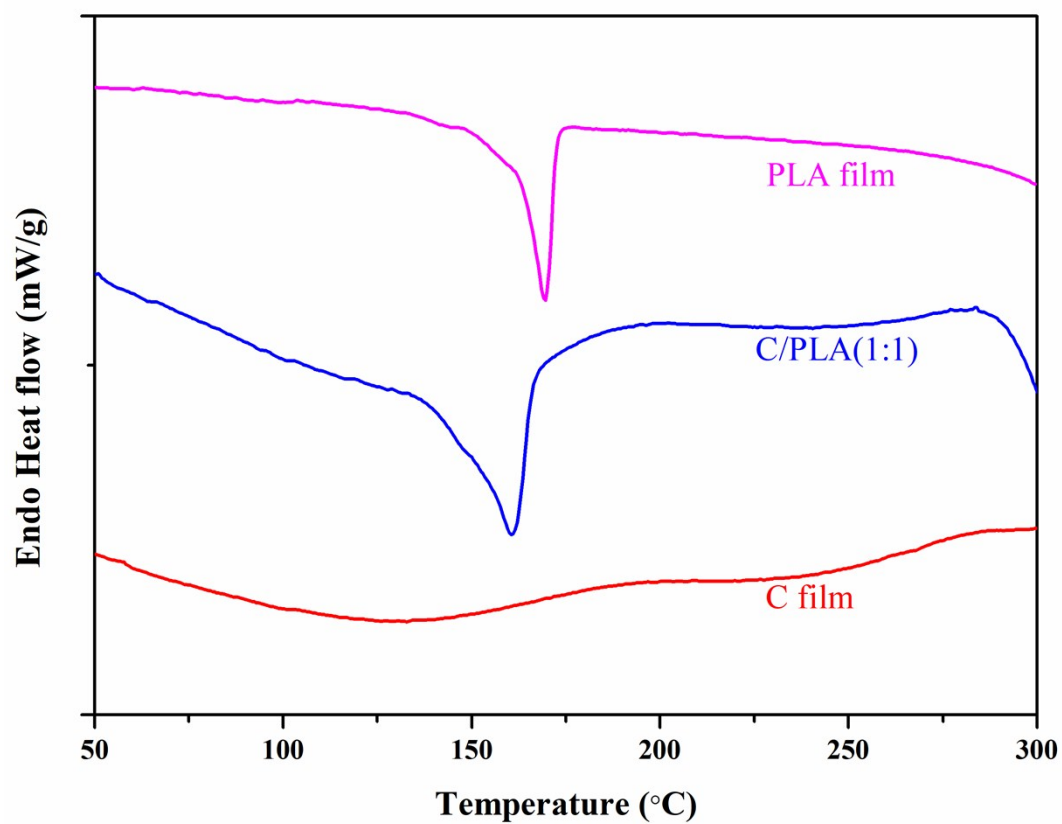

**Figure S2.** DSC curves for the C film, PLA film and C/PLA(1:1) film.

### 3. DSC thermograms of the C/PLA(1:1) film

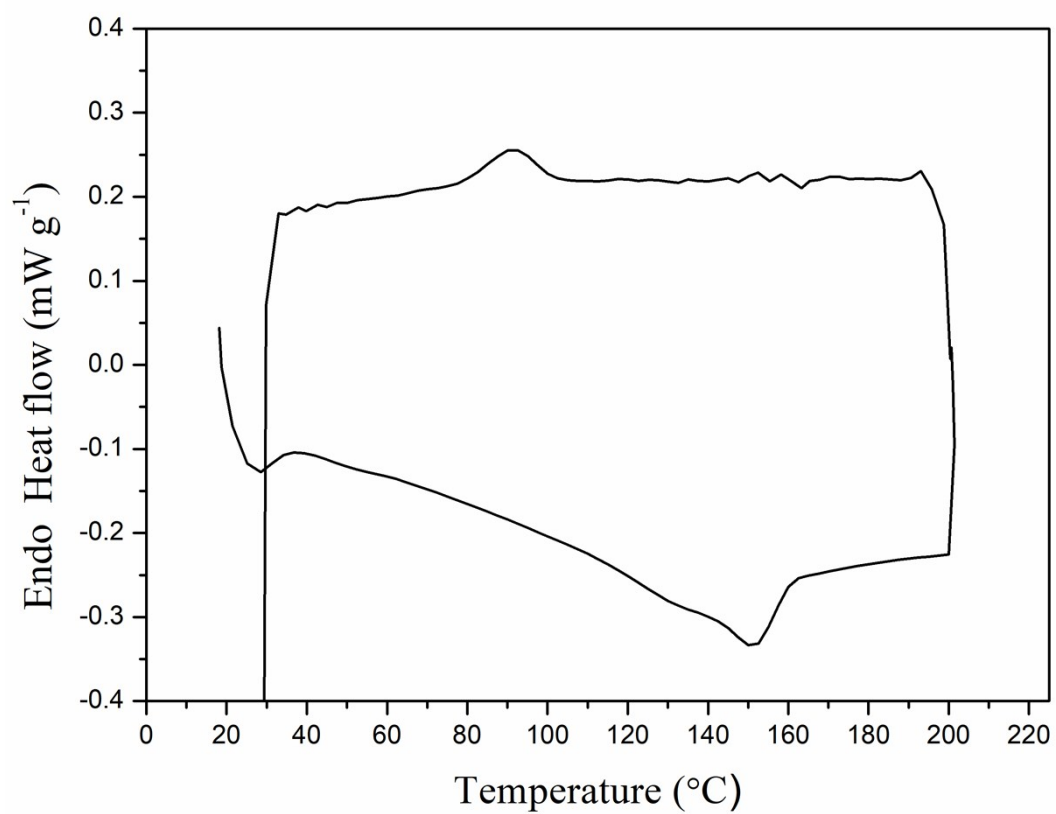

**Figure S3.** DSC thermograms of the C/PLA(1:1) film.

#### 4. SEM images of the pure cellulose film embedded in soil for different days

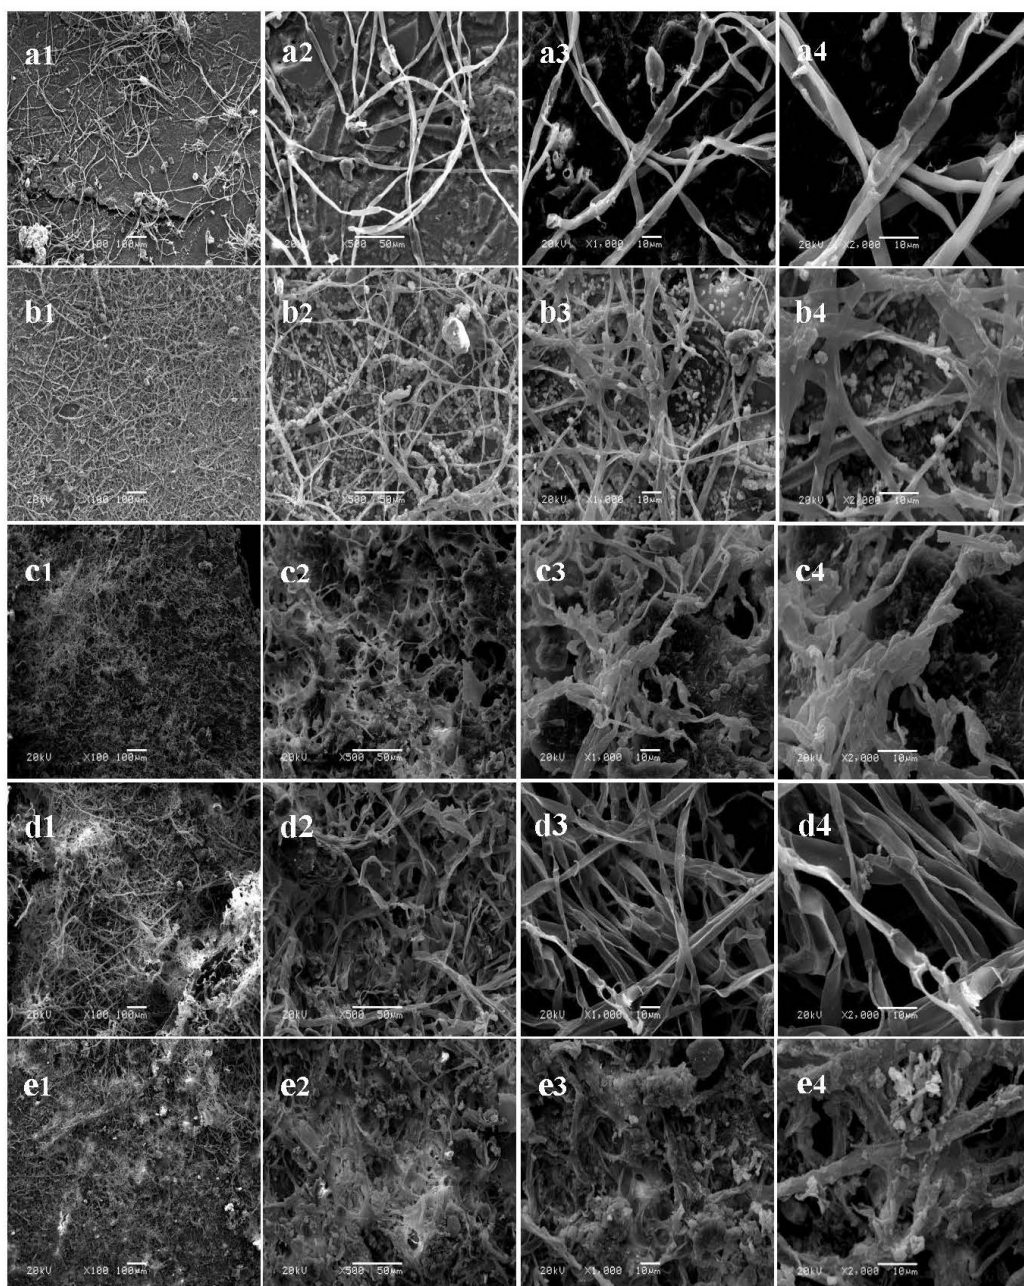

**Figure S4.** SEM images of the surfaces of the pure cellulose film: Degradation of 10 days at 100× magnification (a1), 500× magnification (a2), 1000× magnification (a3) and 2000× magnification (a4); degradation of 30 days at 100× magnification (b1), 500× magnification (b2), 1000× magnification (b3) and 2000× magnification (b4); degradation of 45 days at 100× magnification (c1), 500× magnification (c2), 1000× magnification (c3) and 2000× magnification (c4); degradation of 60 days at 100× magnification (d1), 500× magnification (d2), 1000× magnification (d3) and 2000× magnification (d4); degradation of 90 days at 100× magnification (e1), 500× magnification (e2), 1000× magnification (e3) and 2000× magnification (e4).

## 5. SEM images of the C/PLA (1:1) film embedded in soil for different days

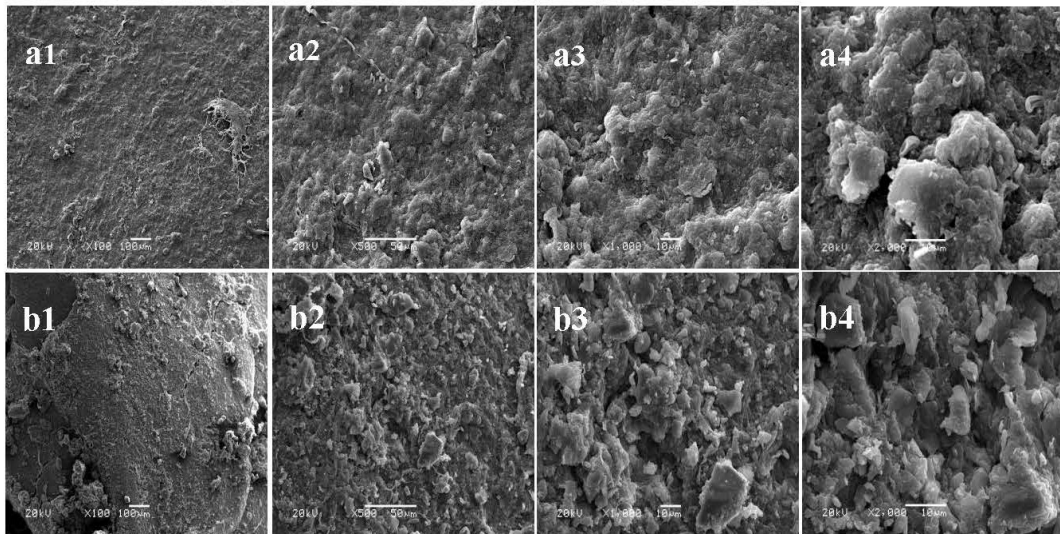

**Figure S5.** SEM images of surfaces of the C/PLA(1:1) composite film: Degradation of 10 days at 100× magnification (a1), 500× magnification (a2), 1000× magnification (a3) and 2000× magnification (a4); degradation of 30 days at 100 × magnification (b1), 500 × magnification (b2), 1000× magnification (b3) and 2000× magnification (b4).

## 6. SEM images of the pure PLA film embedded in soil for different days

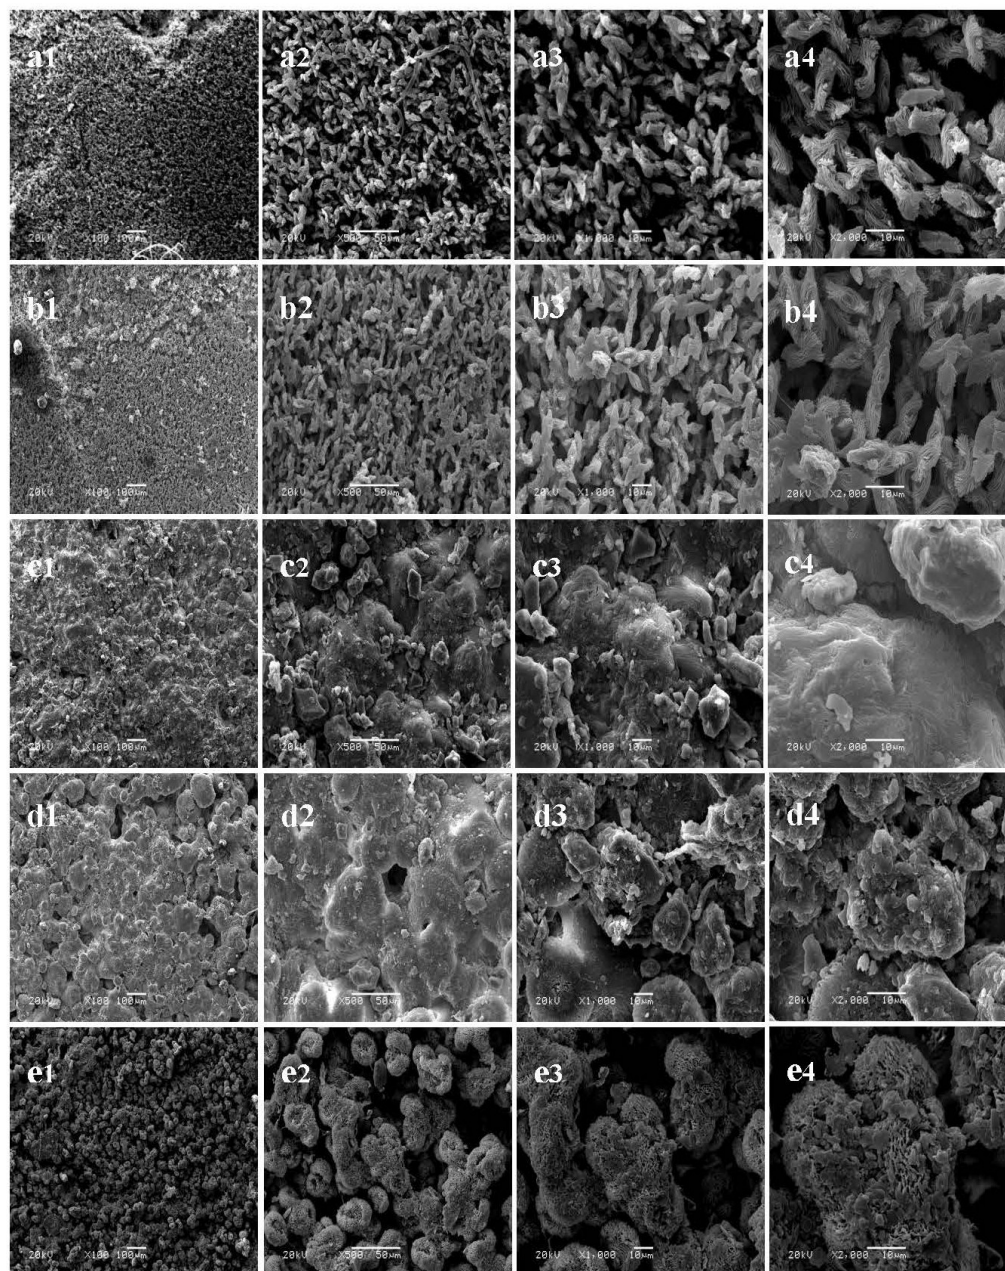

**Figure S6.** SEM images of the surfaces of the pure PLA film: Degradation of 10 days at 100× magnification (a1), 500× magnification (a2), 1000× magnification (a3) and 2000 magnification (a4); degradation of 30 days at 100× magnification (b1), 500× magnification (b2), 1000× magnification (b3) and 2000 magnification (b4); degradation of 45 days at 100× magnification (c1), 500× magnification (c2), 1000× magnification (c3) and 2000 magnification (c4); degradation of 60 days at 100× magnification (d1), 500× magnification (d2), 1000× magnification (d3) and 2000× magnification (d4); degradation of 90 days at 100× magnification (e1), 500× magnification (e2), 1000× magnification (e3) and 2000 magnification (e4).

## 7. Breaking elongation of the cellulose and C/PLA films

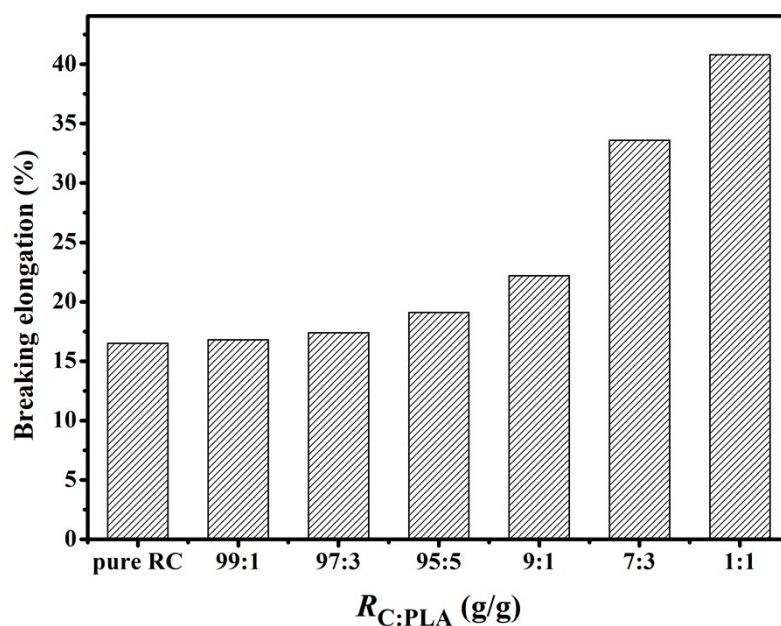

Figure S7. Breaking elongation of the cellulose and C/PLA films

## 8. The cell viability data at different incubation times

Table S1. The cell viability (%) at different incubation times

| sample              | cell viability (%) |     |     |     |
|---------------------|--------------------|-----|-----|-----|
|                     | 1d                 | 3d  | 5d  | 7d  |
| Pure cellulose film | 108                | 107 | 107 | 107 |
| C/PLA (9:1)         | 116                | 126 | 126 | 124 |
| C/PLA (7:3)         | 116                | 126 | 126 | 127 |
| C/PLA (1:1)         | 120                | 132 | 130 | 132 |
